# Supplementary material
Source: publisher figshare collection journal article supplement (https://tandf.figshare.com/articles/dataset/_/6283055)
Supplement: Supplementary file 1 [file 1]

538000 539000 540000 541000 542000 543000 544000 545000 546000 547000 548000

8736000  
8735000  
8734000  
8733000  
8732000  
8731000  
8730000

8736000  
8735000  
8734000  
8733000  
8732000  
8731000  
8730000

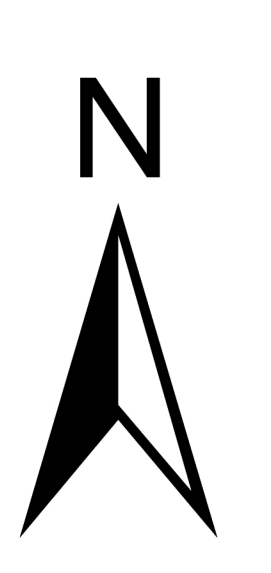

# Nordenskiöldbreen forefield

## Landforms and sediments

Scale  
1:10.000  
Contour lines 25 m  
Lis Allaart 2016

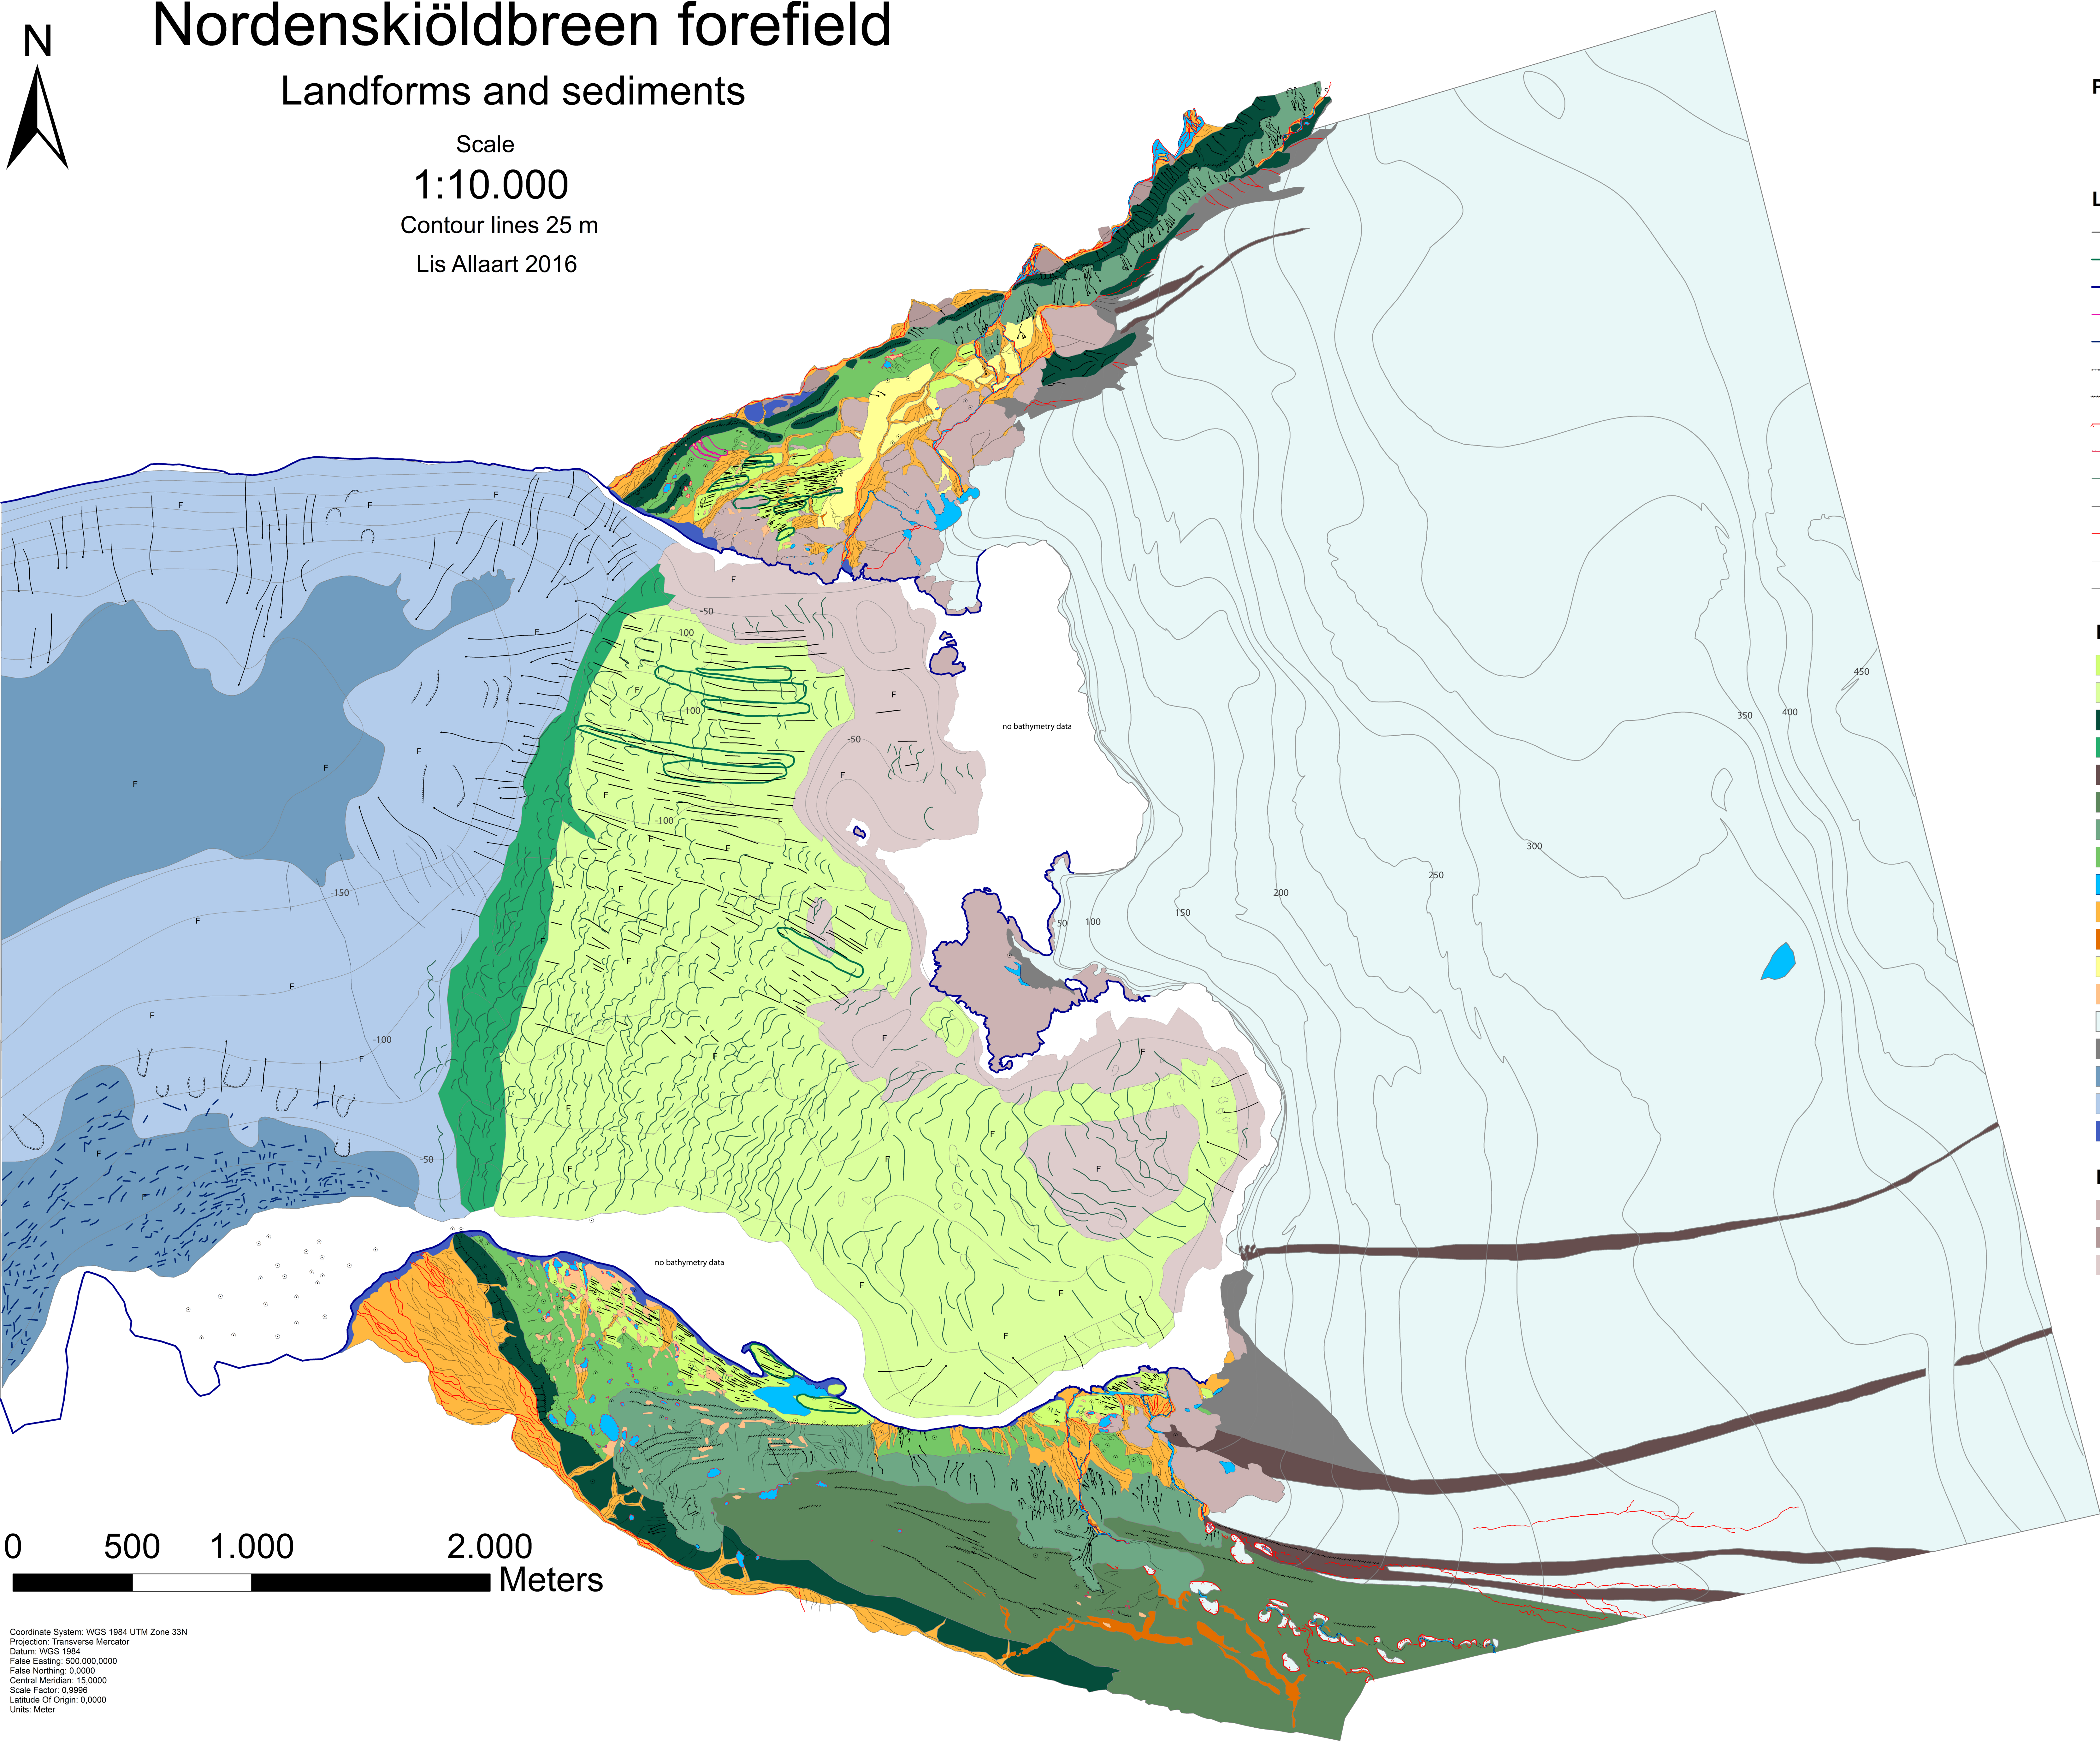

### Point symbols

- F Finegrained glacimarine sediment, unknown thickness
- \*
- Large single boulder

### Line features

- Flute
- Drumlin
- Shoreline
- Curving ridges
- Ice berg scour mark
- Land-slide back-scarp
- Ridge
- Retreating thaw edge in ice-cored moraine
- Large kettle hole
- Transverse ridge
- Gravitational flow track
- Melt water channel, active
- Melt water channel, relict
- Contours

### Polygon features

- Subglacial till
- Glacigenic material, sculptured ( submarine )
- Terminal moraine
- Terminal moraine ( submarine )
- Medial moraine
- Debris covered dead ice
- Hummocky moraine, early stage
- Hummocky moraine, developed stage
- Water
- Outwash fan
- Sinous shaped gravel ridge
- Kame terrace
- Dead ice hole, dry
- Glacier ice
- Debris covered glacier ice
- Distal seafloor
- Debris flow lobe ( submarine )
- Beaches, Holocene and modern

### Bedrock

- Bedrock, scoured
- Bedrock, scoured and weathered
- Bedrock ( submarine )

0 500 1.000 2.000 Meters

Coordinate System: WGS 1984 UTM Zone 33N  
Projection: Transverse Mercator  
Datum: WGS 1984  
False Easting: 500 000 0000  
False Northing: 0 0000  
Central Meridian: 15 0000  
Scale Factor: 0 9998  
Latitude Of Origin: 0 0000  
Units: Meter

538000 539000 540000 541000 542000 543000 544000 545000 546000 547000 548000
